# Supplementary material
Source: PubMed Central journal article supplement (PMC8204775)
Supplement: ciaa382_suppl_supplementary_figure_legend.pdf [file ciaa382_suppl_supplementary_figure_legend.pdf]

## Supplemental Figure Legend

**Supplementary Figure 1: Correlation of BMI with Visceral and Subcutaneous Fat in HIV-Associated NAFLD. A)** In the overall sample, BMI loosely but significantly correlated with visceral fat ( $r = 0.29$ ,  $P = 0.02$ ). **B)** In contrast, BMI was strongly associated with subcutaneous fat ( $r = 0.86$ ,  $P < 0.0001$ ). Linear regression lines are shown with 95% confidence intervals.
