# Supplementary material
Source: PubMed Central journal article supplement (PMC8204775)
Supplement: ciaa382_suppl_supplementary_table_1.pdf [file ciaa382_suppl_supplementary_table_1.pdf]

**Supplementary Table 1: Baseline Characteristics of Study Participants with HIV-Associated NAFLD**

|                                     | <b>Overall Sample</b><br>(n = 58) | <b>Placebo Group Only</b><br>(n = 24) |
|-------------------------------------|-----------------------------------|---------------------------------------|
| <b>Demographics</b>                 |                                   |                                       |
| Age (years)                         | 53 ± 7                            | 53 ± 7                                |
| % Male                              | 81                                | 83                                    |
| Race                                |                                   |                                       |
| % Black                             | 29                                | 33                                    |
| % White                             | 66                                | 63                                    |
| % Hispanic                          | 16                                | 8                                     |
| % Current smoker                    | 17                                | 29                                    |
| % Ever smoker                       | 59                                | 63                                    |
| <b>HIV-related indices</b>          |                                   |                                       |
| Duration of HIV (years)             | 16 ± 9                            | 18 ± 9                                |
| CD4 count (cells/mm <sup>3</sup> )  | 763 ± 279                         | 774 ± 277                             |
| log HIV viral load                  | 0.39 ± 0.66                       | 0.49 ± 0.74                           |
| % NRTI use                          | 93                                | 100                                   |
| % NNRTI use                         | 40                                | 38                                    |
| % PI use                            | 24                                | 21                                    |
| % Integrase inhibitor use           | 62                                | 58                                    |
| <b>Immunologic indices</b>          |                                   |                                       |
| CRP (mg/L)                          | 6.2 ± 7.8                         | 4.2 ± 3.5                             |
| IL-6 (pg/mL)                        | 1.5 ± 1.6                         | 1.9 ± 2.2                             |
| <b>Hepatic indices</b>              |                                   |                                       |
| Liver fat (%)                       | 13.8 ± 8.6                        | 14.5 ± 9.7                            |
| % NASH                              | 33                                | 33                                    |
| NAS score                           | 2.7 ± 1.6                         | 2.8 ± 1.7                             |
| Lobular inflammation                | 1.2 ± 0.6                         | 1.2 ± 0.4                             |
| Hepatocellular ballooning           | 0.3 ± 0.7                         | 0.4 ± 0.7                             |
| Liver biopsy length (mm)            | 13 ± 3                            | 13 ± 3                                |
| ALT (U/L)                           | 30 ± 22                           | 26 ± 19                               |
| AST (U/L)                           | 32 ± 22                           | 36 ± 29                               |
| FIB-4                               | 1.45 ± 0.81                       | 1.55 ± 0.74                           |
| <b>Metabolic indices</b>            |                                   |                                       |
| BMI (kg/m <sup>2</sup> )            | 31 ± 6                            | 32 ± 6                                |
| Waist circumference (cm)            | 110 ± 13                          | 113 ± 12                              |
| Visceral fat (cm <sup>2</sup> )     | 243 ± 99                          | 247 ± 109                             |
| Subcutaneous fat (cm <sup>2</sup> ) | 300 ± 146                         | 324 ± 136                             |
| Fasting glucose (mg/dL)             | 96 ± 17                           | 93 ± 12                               |
| HbA1c (%)                           | 5.7 ± 0.5                         | 5.7 ± 0.6                             |
| Triglycerides (mg/dL)               | 142 ± 69                          | 130 ± 49                              |

Variables are expressed as mean ± SD.

*Abbreviations:* ALT, alanine aminotransferase; AST, aspartate aminotransferase; CRP, C-reactive protein; HbA1c, hemoglobin A1c; IL-6, interleukin-6; NAS score, NAFLD Activity Score; NNRTI, non-nucleoside reverse transcriptase inhibitor; NRTI, nucleoside reverse transcriptase inhibitor; PI, protease inhibitor.
