# Supplementary material
Source: PubMed Central journal article supplement (PMC8204775)
Supplement: ciaa382_suppl_supplementary_table_2.pdf [file ciaa382_suppl_supplementary_table_2.pdf]

**Supplemental Table 2: Relationships of Demographic and HIV-Related Indices with Liver Fibrosis Progression in HIV-Associated NAFLD**

|                                    | <b>Fibrosis Progression</b><br>(n = 9) | <b>No Fibrosis Progression</b><br>(n = 15) | <b>P-value</b> |
|------------------------------------|----------------------------------------|--------------------------------------------|----------------|
| <b>Demographics</b>                |                                        |                                            |                |
| Age (years)                        | 52 ± 5                                 | 54 ± 8                                     | 0.66           |
| % Male                             | 100                                    | 73                                         | 0.09           |
| Race                               |                                        |                                            | 0.11           |
| % Black                            | 11                                     | 47                                         |                |
| % White                            | 89                                     | 47                                         |                |
| % Hispanic                         | 11                                     | 7                                          | 0.70           |
| % Current smoker                   | 22                                     | 33                                         | 0.56           |
| % Ever smoker                      | 44                                     | 73                                         | 0.16           |
| <b>HIV-related indices</b>         |                                        |                                            |                |
| Duration of HIV (years)            | 15 ± 11                                | 19 ± 9                                     | 0.37           |
| CD4 count (cells/mm <sup>3</sup> ) | 836 ± 269                              | 737 ± 285                                  | 0.41           |
| log HIV viral load                 | 0.47 ± 0.72                            | 0.50 ± 0.77                                | 0.92           |
| % NRTI use                         | 100                                    | 100                                        | >0.99          |
| % NNRTI use                        | 22                                     | 47                                         | 0.23           |
| % PI use                           | 22                                     | 20                                         | 0.90           |
| % Integrase inhibitor use          | 56                                     | 60                                         | 0.83           |

Variables are expressed as mean ± SD.

*Abbreviations:* NNRTI, non-nucleoside reverse transcriptase inhibitor; NRTI, nucleoside reverse transcriptase inhibitor; PI, protease inhibitor.
